# Supplementary material for: Insights into supramolecular design from analysis of halide coordination geometry in a protonated polyamine matrix
Source: Royal Society of Chemistry journal article supplement (doi:10.1039/b004641h), 2000-01-01
Supplement: b004641h.doc [file b004641h.doc]

##### Electronic supplementary data section

**Table 1: Hydrogen bonds for new compounds [Å and °].**

**[NH2(CH2)2NH2+(CH2)2NH2] ·Br-, (1a)**

D-H...A d(D-H) d(H...A) d(D...A) <(DHA)

N(1)-H(11)...Br(1)#1 0.86 2.66 3.4853(14) 161.3

N(1)-H(13)...N(1)#2 1.02 1.79 2.800(4) 169.3

Symmetry transformations used to generate equivalent atoms:

#1 x+1,y,z #2 -y+1,x,-z+1

**[NH3+(CH2)2NH(CH2)2NH3+] · 2Cl-, (1b)**

D-H...A d(D-H) d(H...A) d(D...A) <(DHA)

N(1)-H(13)...Cl(1) 0.91 2.36 3.2432(11) 163.7

N(1)-H(12)...Cl(1)#1 0.87 2.51 3.2624(10) 145.7

N(1)-H(11)...Cl(2)#2 0.89 2.31 3.1756(11) 165.6

N(2)-H(21)...Cl(2) 0.87 2.56 3.4080(15) 165.8

Symmetry transformations used to generate equivalent atoms:

#1 x-1/2,y,-z+1/2 #2 -x+1,-y,-z+1

**[NH3+(CH2)2NH(CH2)2NH3+] · 2Br-,(1c)**

D-H...A d(D-H) d(H...A) d(D...A) <(DHA)

N(1)-H(13)...Br(1)#1 0.97 2.64 3.395(4) 135.7

N(1)-H(12)...Br(1)#2 0.96 2.64 3.402(4) 136.0

N(1)-H(12)...Br(2) 0.96 3.00 3.575(4) 119.4

N(1)-H(11)...Br(2)#3 1.11 2.21 3.298(4) 165.7

N(2)-H(21)...Br(2)#1 0.94 2.80 3.683(4) 158.5

N(3)-H(33)...Br(1)#1 1.10 2.42 3.434(4) 152.6

N(3)-H(32)...Br(2)#4 0.99 2.54 3.361(4) 140.1

#### N(3)-H(32)...Br(2) 0.99 3.03 3.639(4) 120.8

N(3)-H(31)...Br(1)#5 0.89 2.47 3.321(4) 161.4

Symmetry transformations used to generate equivalent atoms:

#1 x-1/2,-y-1/2,z #2 x,y-1/2,-z+1/2 #3 x-1/2,-y-1,-z+1/2

#4 -x,-y-1,-z+1 #5 -x-1/2,y-1/2,-z+1

**[NH3+(CH2)2NH(CH2)2NH3+] · 2I-, (1d)**

D-H...A d(D-H) d(H...A) d(D...A) <(DHA)

N(2)-H(21)...I(2)#1 0.95(8) 3.04(7) 3.866(5) 146(5)

N(1)-H(13)...I(1)#2 1.03(7) 2.51(7) 3.538(5) 174(5)

N(1)-H(12)...I(1)#1 0.79(7) 2.90(7) 3.634(5) 154(6)

N(1)-H(11)...I(2)#3 1.02(8) 2.68(7) 3.573(5) 145(5)

N(1)-H(11)...I(2) 1.02(8) 3.23(7) 3.805(5) 117(5)

N(3)-H(33)...I(1)#1 1.02(6) 2.68(6) 3.616(5) 153(4)

N(3)-H(32)...I(1)#4 0.88(8) 2.94(8) 3.604(5) 134(5)

N(3)-H(32)...I(2) 0.88(8) 3.18(7) 3.711(5) 121(5)

N(3)-H(31)...I(2)#5 0.74(6) 2.83(7) 3.547(5) 166(6)

Symmetry transformations used to generate equivalent atoms:

#1 -x+1/2,y-1/2,z #2 x-1/2,-y-1/2,-z+1 #3 -x,-y,-z+1

#4 x-1/2,y,-z+1/2 #5 -x,y-1/2,-z+1/2

**[NH3+(CH2)2NH(CH2)2NH3+] · 3Cl-, (1e)**

D-H...A d(D-H) d(H...A) d(D...A) <(DHA)

N(1)-H(11)...Cl(1) 0.96(3) 2.11(3) 3.0627(16) 178(2)

N(2)-H(22)...Cl(2)#1 0.91(4) 2.35(4) 3.202(2) 156(3)

N(2)-H(21)...Cl(2) 0.90(2) 2.28(2) 3.1750(14) 177.5(18)

Symmetry transformations used to generate equivalent atoms:

#1 -x+1,-y+1,-z+1

**[NH3+(CH2)2NH(CH2)2NH3+] · 3Br-, (1f)**

D-H...A d(D-H) d(H...A) d(D...A) <(DHA)

N(1)-H(13)...Br(2)#1 1.04 2.36 3.206(5) 137.2

N(1)-H(13)...Br(3)#1 1.04 3.07 3.610(6) 113.3

N(1)-H(12)...Br(2)#2 0.85 2.44 3.257(5) 162.2

N(1)-H(11)...Br(1)#3 1.00 2.36 3.320(6) 162.3

N(2)-H(22)...Br(1)#4 0.97 2.33 3.276(6) 163.4

N(2)-H(21)...Br(3)#1 1.05 2.56 3.311(6) 128.4

N(2)-H(21)...Br(2)#2 1.05 2.60 3.293(5) 123.4

N(3)-H(33)...Br(3) 1.01 2.39 3.384(5) 165.7

N(3)-H(32)...Br(1)#5 0.93 2.79 3.502(6) 134.4

N(3)-H(32)...Br(2) 0.93 3.00 3.385(7) 106.7

N(3)-H(31)...Br(2) 0.85 2.69 3.457(7) 150.5

N(3)-H(31)...Br(3)#6 0.85 3.04 3.456(5) 112.8

Symmetry transformations used to generate equivalent atoms:

#1 x-1,-y+3/2,z-1/2 #2 x,-y+3/2,z-1/2 #3 -x+1,-y+1,-z+1

#4 x+1,y,z #5 -x+2,-y+1,-z+2 #6 x-1,y,z

**[NH3+(CH2)3NH(CH2)2NH3+] · 2Br- · H2O, (2a)**

D-H...A d(D-H) d(H...A) d(D...A) <(DHA)

O(1)-H(101)...Br(1)#1 0.85 2.56 3.343(7) 153.3

N(1)-H(13)...Br(2)#2 0.91 2.49 3.345(9) 156.4

N(1)-H(12)...Br(2) 0.91 2.50 3.391(9) 165.1

N(1)-H(11)...Br(1)#3 0.91 2.54 3.366(8) 151.8

N(2)-H(21)...Br(1) 0.96 2.62 3.543(8) 161.7

N(3)-H(33)...O(1) 0.91 1.87 2.768(11) 170.7

N(3)-H(32)...Br(1)#4 0.91 2.59 3.433(9) 154.9

N(3)-H(31)...Br(2)#5 0.91 2.50 3.367(8) 158.4

O(1)-H(102)…N(2)#6 Hydrogen not located 2.741 -

Symmetry transformations used to generate equivalent atoms:

#1 x-1,y,z #2 -x+2,y-1/2,-z+1 #3 -x+1,y+1/2,-z+1

#4 -x+1,y+1/2,-z+2 #5 -x+2,y-1/2,-z+2 #6 -x+1,y-1/2, z-2

**[NH3+(CH2)2NH(CH2)2NH(CH2)2NH3+] · 2Cl- · 2H2O, (3a)**

D-H...A d(D-H) d(H...A) d(D...A) <(DHA)

O(1)-H(102)...Cl(1)#1 0.758(19) 2.49(2) 3.2466(13) 173.0(17)

O(1)-H(101)...N(2) 0.87(2) 1.88(2) 2.7486(15) 172.0(17)

N(1)-H(13)...Cl(1)#2 0.874(18) 2.467(18) 3.2995(13) 159.4(13)

N(1)-H(12)...Cl(1)#3 0.914(18) 2.321(19) 3.1910(15) 159.1(14)

N(1)-H(11)...O(1)#4 0.914(17) 1.876(17) 2.7592(15) 161.9(13)

N(2)-H(21)...Cl(1)#5 0.832(16) 2.701(16) 3.5287(13) 173.2(12)

Symmetry transformations used to generate equivalent atoms:

#1 -x-1,-y+1,-z+1 #2 -x,-y+1,-z+1

#3 x-1,y,z #4 -x-1,y+1/2,-z+3/2 #5 x-1,-y+3/2,z+1/2

**[NH3+(CH2)2NH(CH2)2NH(CH2)2NH3+] · 2Br- · 2H2O, (3b)**

D-H...A d(D-H) d(H...A) d(D...A) <(DHA)

O(1)-H(102)...Br(1)#1 0.88(4) 2.50(5) 3.383(2) 174(4)

O(1)-H(101)...N(2) 0.62(4) 2.15(4) 2.769(3) 176(4)

N(1)-H(13)...Br(1)#2 0.91(4) 2.48(5) 3.350(2) 160(3)

N(1)-H(12)...O(1)#3 1.02(3) 1.77(3) 2.745(3) 160(3)

N(1)-H(11)...Br(1)#4 0.77(3) 2.73(3) 3.455(3) 160(2)

N(2)-H(21)...Br(1) 0.87(3) 2.76(3) 3.612(2) 170(2)

Symmetry transformations used to generate equivalent atoms:

#1 -x+1,y+1/2,-z+1/2 #2 x,-y+1/2,z+1/2

#3 -x,y-1/2,-z+1/2 #4 -x,y+1/2,-z+1/2

**[NH3+(CH2)2NH(CH2)2NH(CH2)2NH3+] · 2I- · 2H2O, (3c)**

D-H...A d(D-H) d(H...A) d(D...A) <(DHA)

O(1)-H(102)...I(1)#1 0.84 2.77 3.593(2) 165.4

O(1)-H(101)...N(1)#2 0.68 2.10 2.774(3) 172.9

N(1)-H(11)...I(1) 0.82(3) 2.98(4) 3.760(2) 161(3)

N(2)-H(23)...I(1)#3 0.80(4) 2.79(4) 3.574(3) 166(3)

N(2)-H(22)...I(1)#4 0.86(3) 2.87(4) 3.654(3) 152(3)

N(2)-H(22)...I(1)#5 0.86(3) 3.21(3) 3.619(3) 112(2)

N(2)-H(21)...O(1) 0.86(4) 1.92(4) 2.746(3) 161(4)

Symmetry transformations used to generate equivalent atoms:

#1 x+1,y,z #2 -x+1,y+1/2,-z+1/2

#3 x,-y+3/2,z+1/2 #4 -x+1,y-1/2,-z+1/2 #5 x+1,-y+3/2,z+1/2

**[NH3+(CH2)2NH2+(CH2)2NH2+(CH2)2NH3+] · 4Br- · H2O, (3d)**

D-H...A d(D-H) d(H...A) d(D...A) <(DHA)

O(1)-H(101)...Br(2)#1 0.93(13) 2.54(13) 3.437(7) 162(10)

N(1)-H(13)...O(1) 0.91 2.47 2.945(9) 112.8

N(1)-H(13)...Br(1)#2 0.91 2.56 3.432(6) 159.5

N(1)-H(12)...Br(4) 0.91 2.45 3.254(6) 147.3

N(1)-H(11)...Br(5)#3 0.91 2.57 3.360(6) 145.5

N(1)-H(11)...Br(2)#3 0.91 3.03 3.332(6) 101.2

N(2)-H(22)...Br(1)#2 0.92 2.31 3.195(6) 161.2

N(2)-H(21)...Br(3) 0.92 2.41 3.284(5) 159.5

N(3)-H(32)...Br(2) 0.92 2.34 3.210(6) 156.8

N(3)-H(31)...Br(5)#2 0.92 2.48 3.265(6) 143.5

N(4)-H(43)...Br(5)#4 0.91 2.40 3.267(6) 158.9

N(4)-H(42)...Br(1)#5 0.91 3.04 3.330(6) 100.9

N(4)-H(42)...Br(2) 0.91 2.52 3.342(6) 151.2

N(4)-H(41)...Br(1)#4 0.91 2.91 3.328(6) 109.7

N(4)-H(41)...Br(3)#5 0.91 2.68 3.429(6) 140.3

O(1)-H(102)...Br(1)#2 Hydrogen not located 3.386 -

Symmetry transformations used to generate equivalent atoms:

#1 -x,-y,z #2 -x+1/2,y+0,z-1/2 #3 -x+1/2,y+1/2,z

#4 -x,-y-1/2,z-1/2 #5 x,y-1/2,z-1/2

**[NH3+(CH2)2NH2+(CH2)2NH2+(CH2)2NH3+] · 4I- · H2O, (3e)**

D-H...A d(D-H) d(H...A) d(D...A) <(DHA)

O(1)-H(101)...I(1)#1 0.85 3.21 3.713(8) 120.0

N(1)-H(13)...I(1)#2 0.91 2.83 3.569(7) 139.3

N(1)-H(12)...I(5) 0.91 2.63 3.492(6) 159.1

N(1)-H(11)...I(4) 0.91 2.87 3.690(7) 150.7

N(2)-H(22)...O(1) 0.92 2.62 3.228(12) 123.9

N(2)-H(22)...I(5)#3 0.92 2.73 3.515(7) 143.7

N(2)-H(21)...I(1)#2 0.92 2.59 3.448(7) 155.5

N(3)-H(32)...I(2)#4 0.92 2.54 3.411(7) 158.8

N(3)-H(31)...I(4)#5 0.92 2.62 3.507(6) 162.2

N(4)-H(43)...I(3)#5 0.91 2.66 3.513(7) 156.1

N(4)-H(42)...I(2)#4 0.91 2.74 3.641(7) 173.8

N(4)-H(41)...I(5)#6 0.91 2.90 3.601(7) 134.9

N(4)-H(41)...I(1)#3 0.91 3.30 3.600(6) 102.0

N(1)-H(11)…I(2)#7 0.91 3.11 3.519(7) 109.81

N(1)-H(13)…I(2) 0.91 3.13 3.526(7) 108.38

O(1)-H(102)...I(2) Hydrogen not located 3.631 -

Symmetry transformations used to generate equivalent atoms:

#1 -x+1/2,y+0,z+1/2 #2 -x,-y+1/2,z+1/2 #3 x+1/2,-y+1/2,z

#4 -x+1/2,y-1/2,z #5 x,y-1/2,z+1/2 #6 x+1/2,-y+0,z+1/2 #7 -x,1-y,z

**[NH3+(CH2)3NH(CH2)2NH(CH2)3NH3+] · 2Cl-, (4a)**

D-H...A d(D-H) d(H...A) d(D...A) <(DHA)

N(1)-H(13)...Cl(1)#1 0.91(3) 2.25(3) 3.165(2) 178(2)

N(1)-H(12)...N(2)#2 0.90(3) 1.96(3) 2.849(2) 170(2)

N(1)-H(11)...Cl(1)#3 0.92(3) 2.24(3) 3.144(2) 170(2)

N(2)-H(21)...Cl(1)#2 0.83(2) 2.61(2) 3.4185(18) 164.5(19)

Symmetry transformations used to generate equivalent atoms:

#1 -x+1,-y+1,-z #2 -x,y-1/2,-z+1/2

#3 -x+1,y-1/2,-z+1/2

**[NH3+(CH2)3NH(CH2)2NH(CH2)3NH3+] · 2Br-, (4b)**

D-H...A d(D-H) d(H...A) d(D...A) <(DHA)

N(1)-H(13)...Br(1)#1 0.93(4) 2.44(4) 3.359(3) 172(3)

N(1)-H(12)...Br(1)#2 0.83(3) 2.53(3) 3.339(2) 165(3)

N(1)-H(11)...N(2)#3 0.81(4) 2.07(4) 2.875(3) 178(4)

N(2)-H(21)...Br(1)#4 0.84(3) 2.71(3) 3.551(2) 171(3)

Symmetry transformations used to generate equivalent atoms:

#1 -x+3,y+1/2,-z+1/2 #2 -x+3,-y+1,-z

#3 x,-y+3/2,z-1/2 #4 x+1,y,z

**[[NH2(CH2)2]2N(CH2)2NH3+] · Br- (5a)**

D-H...A d(D-H) d(H...A) d(D...A) <(DHA)

N(2)-H(23)...Br(1) 0.87(3) 2.70(2) 3.4091(18) 139.3(19)

N(2)-H(22)...N(3)#1 0.87(3) 2.00(3) 2.864(2) 169(2)

N(2)-H(21)...N(4)#2 0.94(3) 1.84(3) 2.777(2) 174(3)

N(3)-H(32)...Br(1) 0.91(3) 2.76(2) 3.5627(17) 148.4(19)

N(3)-H(31)...Br(1)#3 0.88(2) 2.69(2) 3.5107(17) 155.4(19)

N(4)-H(42)...Br(1)#4 0.91(2) 2.77(2) 3.5577(18) 145.6(19)

N(4)-H(41)...Br(1) 0.93(3) 2.76(2) 3.5900(16) 148.0(18)

Symmetry transformations used to generate equivalent atoms:

#1 -x+2,-y,-z #2 -x+2,-y+1,-z #3 -x+2,y-1/2,-z+1/2

#4 -x+2,y+1/2,-z+1/2

**[[NH2(CH2)2]2N(CH2)2NH3+]·I-.H2O(5b)**

D-H...A d(D-H) d(H...A) d(D...A) <(DHA)

O(1)-H(102)...N(3)#1 0.73(4) 2.07(4) 2.793(3) 172(4)

O(1)-H(101)...N(4)#2 0.95(3) 1.81(3) 2.739(3) 164(3)

N(2)-H(23)...I(1)#3 0.79(4) 2.84(4) 3.611(2) 165(3)

N(2)-H(22)...I(1)#4 0.85(3) 3.04(3) 3.697(2) 136(2)

N(2)-H(21)...O(1) 0.93(4) 1.77(4) 2.684(3) 164(3)

N(3)-H(31)...I(1)#5 0.94(4) 3.07(4) 3.964(3) 160(3)

N(3)-H(32)…I(1)#4 0.88(4) 3.34(4) 4.131(3) 151(3)

N(4)-H(42)...I(1)#4 0.84(4) 3.13(4) 3.849(2) 146(3)

N(4)-H(41)...I(1)#6 0.93(3) 2.96(3) 3.820(3) 155(2)

Symmetry transformations used to generate equivalent atoms:

#1 -x,-y+3,-z #2 -x+1,-y+3,-z #3 -x,-y+2,-z

#4 x,y+1,z #5 -x+1/2,y+1/2,-z+1/2 #6 -x+1,-y+2,-z

**N[(CH2)2NH3+]3 · 3Cl- (5c)**

D-H...A d(D-H) d(H...A) d(D...A) <(DHA)

N(1)-H(13)...Cl(1)#1 0.86(3) 2.34(3) 3.1761(18) 164(2)

N(1)-H(12)...Cl(3)#2 1.00(3) 2.25(3) 3.2426(18) 169(2)

N(1)-H(11)...Cl(2) 0.88(2) 2.38(2) 3.2231(16) 159(2)

Symmetry transformations used to generate equivalent atoms:

#1 x-1,y-1,z #2 -x-1/2,-y,z-1/2

**N[(CH2)2NH3+]3 · 3I- (5d)**

D-H...A d(D-H) d(H...A) d(D...A) <(DHA)

N(1)-H(13)...I(1) 0.91 2.93 3.621(6) 134.3

# N(1)-H(12)...I(1)#3 0.91 2.72 3.566(6) 155.9

N(1)-H(11)...I(1)#4 0.91 2.80 3.535(6) 139.1

Symmetry transformations used to generate equivalent atoms:

#1 -y+1,x-y-1,z #2 -x+y+2,-x+1,z #3 -x+y+4/3,y-1/3,z+1/6

#4 -x+y+4/3,-x+2/3,z-1/3

**NH+[(CH2)2NH3+]3 · 4Br- · H2O (5e)**

D-H...A d(D-H) d(H...A) d(D...A) <(DHA)

O(1)-H(102)...Br(6)#1 0.82(9) 2.66(10) 3.461(7) 166(9)

O(1)-H(101)...Br(4)#2 0.76(13) 2.84(12) 3.370(7) 128(12)

O(2)-H(202)…Br(5)#2 Hydrogen atom not located 3.326 -

O(2)-H(201)…Br(4)#2 Hydrogen atom not located 3.441 -

N(1)-H(13)...Br(6)#3 0.91 2.52 3.395(7) 161.2

N(1)-H(12)...Br(8)#4 0.91 2.65 3.397(7) 139.6

N(1)-H(12)...Br(5)#2 0.91 2.88 3.298(7) 109.5

N(1)-H(11)...Br(1)#2 0.91 2.59 3.358(7) 142.7

N(2)-H(21)...Br(1)#3 0.79(8) 2.45(9) 3.210(7) 162(8)

N(3)-H(33)...Br(4)#5 0.91 2.42 3.276(6) 157.7

N(3)-H(32)...Br(1) 0.91 2.61 3.281(6) 130.8

N(3)-H(32)...Br(7)#6 0.91 2.96 3.614(7) 130.0

N(3)-H(32)...Br(6)#3 0.91 3.09 3.457(7) 106.5

N(3)-H(31)...Br(5)#5 0.91 2.39 3.237(7) 154.0

N(4)-H(43)...O(2) 0.91 2.25 2.848(10) 123.3

N(4)-H(43)...Br(7) 0.91 2.89 3.580(7) 133.9

N(4)-H(42)...Br(8) 0.91 2.39 3.262(7) 161.6

N(4)-H(41)...Br(3) 0.91 2.56 3.350(7) 145.6

N(4)-H(41)...Br(2) 0.91 3.17 3.485(7) 102.2

N(5)-H(53)...O(1) 0.91 2.28 3.019(9) 137.6

N(5)-H(53)...Br(2) 0.91 2.94 3.444(8) 116.6

N(5)-H(52)...Br(6)#7 0.91 2.44 3.253(8) 149.1

N(5)-H(51)...Br(7)#7 0.91 2.44 3.242(6) 146.5

N(6)-H(61)...Br(2)#7 0.82(7) 2.48(8) 3.278(7) 163(7)

N(7)-H(73)...Br(7)#8 0.91 2.57 3.338(7) 142.5

N(7)-H(72)...Br(8) 0.91 2.56 3.321(7) 141.1

N(7)-H(72)...Br(5) 0.91 3.03 3.461(7) 110.9

N(7)-H(71)...Br(3) 0.91 2.53 3.343(7) 148.4

N(7)-H(71)...Br(1) 0.91 2.85 3.279(7) 110.1

N(8)-H(83)...Br(3)#7 0.91 2.53 3.329(6) 147.2

N(8)-H(83)...Br(4)#9 0.91 3.10 3.439(6) 103.9

N(8)-H(82)...Br(4) 0.91 2.51 3.361(6) 156.1

N(8)-H(81)...Br(2)#8 0.91 2.47 3.296(8) 151.0

Symmetry transformations used to generate equivalent atoms:

#1 x,-y+1/2,z-1/2 #2 x,y+1,z #3 -x,y+1/2,-z+1/2

#4 -x,-y+1,-z #5 -x,-y,-z #6 -x,y-1/2,-z+1/2

#7 -x+1,y-1/2,-z+1/2 #8 x,y-1,z #9 –x+1,-y-1,-z

**Table 2: Anion coordination environments for the complexed halides.**

| Compound | Host:Guest ratio | Anion | Coord. Number | D…A…D angles (°) | Coord. Geometry | Comments |
| --- | --- | --- | --- | --- | --- | --- |
| **1a** | 1:1 | Br(1) | 4 | 101.1, 101.1, 101.1,  101.1, 127.9, 127.9 | Distorted Tetrahedral | All-anti amine conformation |
| **1b** | 1:2 | Cl(1) | 4 | 79.1, 79.7, 93.3, 93.3, 150.9, 150.9 | Cl(1) forms the apex of a square pyramid | Cl(1) chelated |
|  |  | Cl(2) | 3 | 89.9, 94.9, 94.2 | Cl(2) forms the apex of a trigonal pyramid |  |
| **1c** | 1:2 | Br(1) | 4 | 79.8, 81.9, 90.5,  98.0, 153.1, 158.6 | Br(1) forms the apex of a square pyramid | Br(1) chelated - almost isostructural with **1b** |
|  |  | Br(2)** | 5 | 76.7, 80.4, 80.7, 80.7, 96.0, 96.5, 98.8, 106.0, 173.1, 176.0 | Br(2) in the middle of the base of a distorted square pyramid |  |
| **1d** | 1:2 | I(1) | 4 | 77.1, 81.8, 91.8,  98.5, 152.7, 156.6 | I(1) forms the apex of a square pyramid | I(1) chelated - isostructural with **1c** |
|  |  | I(2)** | 5 | 73.9, 80.8, 81.3, 82.1, 94.4, 97.2, 97.8, 106.0, 171.3, 175.7 | I(2) in the middle of the base of a distorted square pyramid |  |
| **1e** | 1:3 | Cl(1) | 2 | 112.8 | ‘V’-shaped | All-anti conformation |
|  |  | Cl(2) | 3 | 81.3, 81.3, 106.9 | Cl(2) forms the apex of a flattened trigonal pyramid |  |
| **1f** | 1:3 | Br(1) | 3 | 78.6, 109.3, 171.4 | Apex of a highly distorted trigonal pyramid (‘T-shape’) | Host slightly bent |
|  |  | Br(2)* | 5 | 56.1, 81.9, 91.8, 92.9, 102.4, 105.0, 107.1, 121.4, 147.81, 148.8 | Irregular geometry |  |
|  |  | Br(3)** | 4 | 52.6, 91.5, 98.2, 99.7, 130.4, 135.0 | Br(3) forms the apex of a distorted square pyramid |  |
| **2a** | 1:2 | Br(1) | 4 | 74.3, 81.6, 90.3,  94.9, 136.9, 153.5 | Br(1) forms the apex of a square pyramid | All-anti conformation. Presence of water molecules within hydrophilic channels. |
|  |  | Br(2) | 3 | 75.4, 135.7, 140.4 | Br(2) forms the apex of a trigonal pyramid |  |
| **3a** | 1:2 | Cl(1) | 4 | 71.9, 84.0, 87.1,  94.0, 130.8, 151.7 | Cl(1) forms the apex of a square pyramid | All-anti conformation. Presence of water molecules within hydrophilic channels. |
| **3b** | 1:2 | Br(1) | 4 | 73.2, 85.2, 87.3,  92.5, 130.6, 153.2 | Br(1) forms the apex of a square pyramid | Isostructural with **3a** |
| **3c** | 1:2 | I(1)* | 5 | 75.7, 84.0, 87.9, 88.1, 91.3, 103.5, 116.7, 118.9,132.6, 158.0 | I(1) in the middle of the base of a distorted square pyramid | Isostructural with **3a** |
| **3d** | 1:4 | Br(1) | 5 | 51.2, 58.1, 66.0, 84.0, 95.6, 99.9, 107.6, 121.7, 153.65, 171.9 | Irregular geometry | Z- shaped (see text). Existence of water molecules within hydrophilic channels |
|  |  | Br(2) | 4 | 58.7, 86.2, 93.0, 97.3, 97.5, 169.5 | Br(2) forms the apex of a distorted square pyramid |  |
|  |  | Br(3) | 4 | 81.1, 91.7, 91.7, 121.3, 121.3, 137.7 | Br(3) forms the apex of a distorted square pyramid |  |
|  |  | Br(4) | 2 | 102.5 | ‘V’-shape |  |
|  |  | Br(5) | 3 | 113.6, 114.0, 129.4 | Br(5) in the middle of an equilateral triangle |  |
| **3e** | 1:4 | I(1)* | 4 | 55.1, 82.9, 91.4, 92.8, 101.3, 175.3 | Irregular geometry | Isostructural with **3d** |
|  |  | I(2)** | 4 | 55.5, 86.2, 92.8, 108.4, 118.0, 148.2 | Irregular geometry |  |
|  |  | I(3) | 2 | 97.7 | ‘V’- shape |  |
|  |  | I(4) | 4 | 81.5, 93.3, 93.3, 120.9, 120.9, 135.7 | Irregular geometry |  |
|  |  | I(5) | 3 | 111.9, 114.9, 129.5 | I(5) in the middle of an equilateral triangle |  |
| **4a** | 1:2 | Cl(1) | 3 | 94.6, 106.0, 116.1 | Cl(1) in the apex of a flattened trigonal pyramid | Z- shaped (see text) |
| **4b** | 1:2 | Br(1) | 3 | 89.6, 105.5, 163.5 | Distorted T-shape | Extended conformation, almost isostructural with **4a** |
| **5a** | 1:1 | Br(1) | 5 | 63.0, 63.2, 70.5, 72.6, 76.1, 77.9, 108.6, 109.1, 131.4, 134.4 | Irregular geometry | Br(1) chelated |
| **5b** | 1:1 | I(1)* | 5 | 65.5, 68.5, 79.7, 82.4, 84.2, 116.5, 116.7, 121.5, 125.4, 150.7 | Irregular geometry | I(1) chelated |
| **5c** | 1:3 | Cl(1) | 3 | 84.0, 84.0, 84.0 | Cl(1) forms the apex of a trigonal pyramid | Cl1 chelated |
|  |  | Cl(2) | 3 | 77.3, 77.3, 77,3 | Cl(2) forms the apex of a trigonal pyramid |  |
|  |  | Cl(3) | 3 | 76.7, 76.7, 76.7 | Cl(3) forms the apex of a trigonal pyramid |  |
| **5d** | 1:3 | I(1)** | 5 | 73.7, 76.6, 76.6, 88.1, 89.8, 109,8, 118.1, 128.7, 150.2, 154.0 | Irregular geometry | Ligand distorted from linear conformation (see text) |
|  |  | I(2)** | 5 | 73.4, 76.3, 77.3, 87.4, 90.6, 110.1, 118.1, 128.6, 149.6, 153.7 | Irregular geometry |  |
| **5e** | 1:4 | Br(1) | 4 | 77.4, 91.4, 101.2,  118.6, 127.0, 130.2 | Irregular geometry | Ligand distorted from linear conformation (see text). Existence of water molecules within hydrophilic channels. |
|  |  | Br(2)** | 4 | 81.1, 100.3, 107.7, 108.5, 110.8, 143.1 | Br(2) forms the apex of a flattened trigonal pyramid |  |
|  |  | Br(3) | 3 | 82.8, 98.7, 125.5 | Br(3) forms the apex of a trigonal pyramid |  |
|  |  | Br(4)* | 5 | 70.3, 70.7, 75.3, 80.3, 97.9, 99.0, 124.2, 125.9, 133.8, 141.8 | Irregular geometry |  |
|  |  | Br(5)* | 4 | 72.3, 89.3, 90.6, 122.6, 133.2, 137.1 | Irregular geometry |  |
|  |  | Br(6)* | 4 | 73.6, 74.6, 94.4,  119.8, 133.9, 166.6 | Irregular geometry |  |
|  |  | Br(7) | 4 | 71.7, 92.2, 111.2,  113.9, 116.9, 130.3 | Irregular geometry |  |
|  |  | Br(8) | 3 | 84.5, 102.4, 165.3 | Distorted T- shaped |  |

- * Denotes that one of the hydrogen bonds accepted by this anion is rather a long interaction, close to the cut-off limit.

** Denotes that two of the hydrogen bonds accepted by this anion are rather long interactions, close to the cut-off limit.
